# Supplementary material
Source: PubMed Central journal article supplement (PMC11019343)
Supplement: NIHMS1974322-supplement-Supplementary_File.pdf [file NIHMS1974322-supplement-Supplementary_File.pdf]

## Relative gene expression level for the listed genes

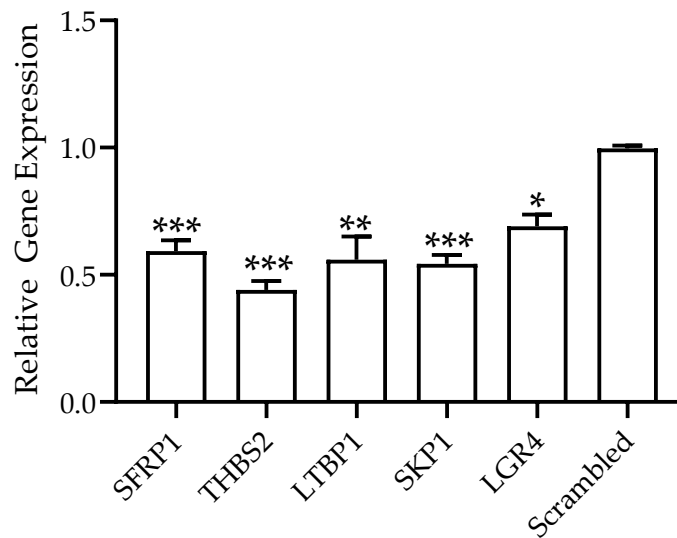

Figure 1S- Relative Gene Expression for the selected genes

## ANOVA and Dunnett's test tables

Table 1S- Table of ANOVA summary for the Extent of Invasion Dataset

| ANOVA Summary for Extent of Invasion          |         |
|-----------------------------------------------|---------|
| F                                             | 6.493   |
| P value                                       | <0.0001 |
| P value summary                               | ****    |
| Significant diff. among means ( $P < 0.05$ )? | Yes     |
| R squared                                     | 0.3401  |

Table 2S- Table of Dunnett's Test for the Extent of Invasion Dataset

| Dunnett's Test for Extent of Invasion |            |                    |              |         |                  |
|---------------------------------------|------------|--------------------|--------------|---------|------------------|
| Number of families                    | 1          |                    |              |         |                  |
| Number of comparisons per family      | 5          |                    |              |         |                  |
| Alpha                                 | 0.05       |                    |              |         |                  |
| Dunnett's multiple comparisons test   | Mean Diff. | 95.00% CI of diff. | Significant? | Summary | Adjusted P Value |
| Scrambled vs. SFRP1                   | 10.75      | -0.7786 to 22.28   | No           | ns      | 0.0758           |
| Scrambled vs. THBS2                   | 20.82      | 9.544 to 32.10     | Yes          | ****    | <0.0001          |
| Scrambled vs. LTBP1                   | 12.95      | 1.675 to 24.23     | Yes          | *       | 0.0185           |
| Scrambled vs. SKP1                    | 18.1       | 6.826 to 29.38     | Yes          | ***     | 0.0005           |
| Scrambled vs. LGR4                    | 4.219      | -7.608 to 16.05    | No           | ns      | 0.8273           |

Table 3S- Table of ANOVA summary for the Number of Invasive Fronts

| <b>ANOVA Summary for Number of Invasive Fronts</b> |         |
|----------------------------------------------------|---------|
| F                                                  | 26.87   |
| P value                                            | <0.0001 |
| P value summary                                    | ****    |
| Significant diff. among means (P < 0.05)?          | Yes     |
| R squared                                          | 0.6773  |

Table 4S- Table of the Dunnett's Test for Number of Invasive fronts

| <b>Dunnett's Test for Number of Invasive Fronts</b> |                   |                           |                     |                |                         |
|-----------------------------------------------------|-------------------|---------------------------|---------------------|----------------|-------------------------|
| Number of families                                  | 1                 |                           |                     |                |                         |
| Number of comparisons per family                    | 5                 |                           |                     |                |                         |
| Alpha                                               | 0.05              |                           |                     |                |                         |
| <b>Dunnett's multiple comparisons test</b>          | <b>Mean Diff.</b> | <b>95.00% CI of diff.</b> | <b>Significant?</b> | <b>Summary</b> | <b>Adjusted P Value</b> |
| Scrambled vs. SFRP1                                 | 3.417             | 2.426 to 4.408            | Yes                 | ****           | <0.0001                 |
| Scrambled vs. THBS2                                 | 2.379             | 1.366 to 3.392            | Yes                 | ****           | <0.0001                 |
| Scrambled vs. LTBP1                                 | 2.015             | 1.002 to 3.028            | Yes                 | ****           | <0.0001                 |
| Scrambled vs. SKP1                                  | 0.3333            | -0.6575 to 1.324          | No                  | ns             | 0.8565                  |
| Scrambled vs. LGR4                                  | 0.1667            | -0.8242 to 1.158          | No                  | ns             | 0.9911                  |

Table 5S- Table of ANOVA summary for Migration Rate of Invasive Fronts

| <b>ANOVA Summary for Migration Rate of Invasive Fronts</b> |         |
|------------------------------------------------------------|---------|
| F                                                          | 30.9    |
| P value                                                    | <0.0001 |
| P value summary                                            | ****    |
| Significant diff. among means (P < 0.05)?                  | Yes     |
| R squared                                                  | 0.741   |

Table 6S- Table of the Dunnett's Test for Migration Rate of Invasive Fronts

| <b>Dunnett's Test for Migration Rate of Invasive Fronts</b> |                   |                           |                     |                |                         |
|-------------------------------------------------------------|-------------------|---------------------------|---------------------|----------------|-------------------------|
| Number of families                                          | 1                 |                           |                     |                |                         |
| Number of comparisons per family                            | 5                 |                           |                     |                |                         |
| Alpha                                                       | 0.05              |                           |                     |                |                         |
| <b>Dunnett's multiple comparisons test</b>                  | <b>Mean Diff.</b> | <b>95.00% CI of diff.</b> | <b>Significant?</b> | <b>Summary</b> | <b>Adjusted P Value</b> |
| Scrambled vs. SFRP1                                         | 0.4616            | 0.1929 to 0.7303          | Yes                 | ***            | 0.0002                  |
| Scrambled vs. THBS2                                         | 1.068             | 0.7993 to 1.337           | Yes                 | ****           | <0.0001                 |
| Scrambled vs. LTBP1                                         | 0.288             | 0.01928 to 0.5567         | Yes                 | *              | 0.0315                  |
| Scrambled vs. SKP1                                          | 0.978             | 0.7093 to 1.247           | Yes                 | ****           | <0.0001                 |
| Scrambled vs. LGR4                                          | 0.526             | 0.2572 to 0.7947          | Yes                 | ****           | <0.0001                 |
